# Supplementary material for: One-step purification of nucleic acid for gene expression analysis via Immiscible Filtration Assisted by Surface Tension (IFAST)
Source: Royal Society of Chemistry journal article supplement (doi:10.1039/c1lc00004g), 2011-01-01
Supplement: c1lc00004g.pdf [file c1lc00004g.pdf]

Supplementary Table 1 – Contact angles of 5  $\mu$ l droplets on polymer surface as measured by a goniometer. Outcome is considered successful if flow arrests at microfluidic constriction in a Phase-Gate device composed of that material. Outcome is considered a failure if liquid leaks past microfluidic constriction into adjacent chamber.

| Liquid       | Solid    | Contact Angle (deg) | Outcome |
|--------------|----------|---------------------|---------|
| PBS          | PDMS     | 104                 | Success |
| PBS          | Parylene | 80                  | Success |
| PBS          | PS       | 75                  | Success |
| TRIZol       | PDMS     | 78                  | Success |
| TRIZol       | Parylene | 32                  | Failure |
| TRIZol       | PS       | 10                  | Failure |
| Lysis Buffer | PDMS     | 63                  | Success |
| Lysis Buffer | Parylene | 34                  | Failure |
| Lysis Buffer | PS       | 28                  | Failure |

Supplementary Table 2 – Primer sequences and annealing temperatures for the genes amplified via RT-PCR.

| Gene        | Annealing Temp ( $^{\circ}$ C) | Direction | Sequence              |
|-------------|--------------------------------|-----------|-----------------------|
| P0          | 60                             | Forward   | GACAATGGCAGCATCTACAAC |
|             |                                | Reverse   | GCAGACAGACACTGGCAAC   |
| ER $\alpha$ | 57                             | Forward   | CCTGATGATTGGTCTCGTCTG |
|             |                                | Reverse   | GGCACACAAACTCCTCTCC   |
| GR          | 60                             | Forward   | TGACAACTTGACTTCTCTG   |
|             |                                | Reverse   | AAGACTCCATAATGACATCC  |
